# Supplementary material
Source: MDPI journal article supplement (https://www.mdpi.com/2073-4441/15/4/815)
Supplement: s1 [file s1]

| SPECIES_SAMPLES             | 2013 | 2005 | 1997 | 1989 | 1981 | 1973 | 1965 | 1958 | 1950 | 1942 | 1936 | 1928 | 1922 | 1918 | 1913 | 1906 | 1876 | 1853 | 1823 | 1794 | 1765 | 1735 | 1686 |
|-----------------------------|------|------|------|------|------|------|------|------|------|------|------|------|------|------|------|------|------|------|------|------|------|------|------|
| Adelosina_sp                | 0    | 0    | 0    | 1    | 0    | 3    | 2    | 0    | 1    | 1    | 3    | 2    | 0    | 2    | 0    | 2    | 0    | 3    | 1    | 0    | 0    | 2    | 2    |
| Ammodiscus_planorbis        | 0    | 0    | 0    | 0    | 1    | 0    | 0    | 0    | 1    | 0    | 2    | 0    | 0    | 0    | 0    | 0    | 0    | 0    | 0    | 0    | 0    | 0    | 0    |
| Ammonia_beccarii            | 1    | 7    | 6    | 12   | 8    | 10   | 8    | 12   | 12   | 12   | 6    | 12   | 16   | 15   | 4    | 12   | 29   | 12   | 30   | 1    | 0    | 0    | 14   |
| Amphicoryna_scalaris        | 1    | 1    | 0    | 0    | 0    | 0    | 1    | 0    | 3    | 1    | 1    | 0    | 1    | 0    | 0    | 0    | 0    | 1    | 0    | 1    | 0    | 2    | 0    |
| Asterigerinata_mamilla      | 0    | 0    | 0    | 0    | 0    | 0    | 0    | 1    | 0    | 0    | 0    | 0    | 0    | 0    | 0    | 0    | 0    | 0    | 0    | 0    | 1    | 0    | 0    |
| Bigenerina_nodosaria        | 0    | 7    | 11   | 14   | 6    | 15   | 8    | 12   | 10   | 13   | 10   | 6    | 10   | 7    | 4    | 10   | 4    | 2    | 0    | 3    | 3    | 3    | 10   |
| Bolivina_alata              | 1    | 7    | 5    | 1    | 13   | 14   | 7    | 10   | 17   | 6    | 19   | 7    | 13   | 11   | 11   | 12   | 9    | 5    | 6    | 21   | 20   | 13   | 10   |
| Bolivina_catanensis         | 32   | 12   | 10   | 0    | 9    | 2    | 0    | 0    | 0    | 0    | 2    | 3    | 4    | 3    | 0    | 1    | 4    | 4    | 2    | 1    | 1    | 0    | 0    |
| Bolivina_pseudoplicata      | 1    | 0    | 0    | 0    | 0    | 0    | 0    | 0    | 0    | 0    | 0    | 0    | 0    | 0    | 0    | 0    | 0    | 0    | 0    | 0    | 0    | 0    | 0    |
| Bolivina_spathulata         | 0    | 0    | 0    | 0    | 0    | 0    | 0    | 0    | 0    | 0    | 0    | 0    | 0    | 0    | 0    | 0    | 0    | 0    | 0    | 0    | 0    | 0    | 1    |
| Bulimina_costata            | 1    | 3    | 1    | 4    | 3    | 4    | 0    | 1    | 2    | 1    | 0    | 0    | 0    | 1    | 1    | 2    | 1    | 1    | 0    | 0    | 4    | 1    | 1    |
| Bulimina_elongata           | 3    | 0    | 0    | 0    | 0    | 0    | 0    | 3    | 0    | 0    | 0    | 0    | 0    | 0    | 0    | 0    | 0    | 0    | 0    | 0    | 0    | 0    | 0    |
| Bulimina_gibba              | 12   | 12   | 17   | 5    | 17   | 26   | 37   | 33   | 46   | 63   | 60   | 81   | 47   | 35   | 18   | 7    | 10   | 8    | 6    | 23   | 24   | 18   | 28   |
| Bulimina_marginata          | 20   | 9    | 16   | 11   | 12   | 21   | 11   | 17   | 8    | 7    | 3    | 3    | 6    | 14   | 12   | 19   | 10   | 18   | 25   | 29   | 19   | 10   | 25   |
| Cassidulina_carinata        | 20   | 40   | 20   | 26   | 31   | 25   | 27   | 16   | 17   | 22   | 27   | 20   | 18   | 14   | 23   | 33   | 31   | 43   | 41   | 24   | 14   | 11   | 20   |
| Cibicides_pseudoungerianus  | 0    | 0    | 0    | 0    | 0    | 1    | 2    | 1    | 0    | 0    | 0    | 0    | 0    | 0    | 0    | 0    | 0    | 0    | 0    | 0    | 1    | 0    | 3    |
| Dentalina_leguminiformis    | 0    | 1    | 2    | 0    | 0    | 0    | 0    | 0    | 1    | 0    | 0    | 0    | 0    | 0    | 0    | 0    | 0    | 0    | 0    | 0    | 0    | 0    | 0    |
| Dentalina_sp                | 0    | 0    | 2    | 0    | 0    | 0    | 0    | 0    | 1    | 0    | 1    | 0    | 1    | 0    | 0    | 0    | 0    | 0    | 0    | 0    | 0    | 0    | 0    |
| Elphidium_crispum           | 0    | 0    | 0    | 0    | 0    | 0    | 0    | 0    | 7    | 9    | 5    | 9    | 12   | 13   | 5    | 5    | 10   | 15   | 2    | 17   | 10   | 15   | 0    |
| Elphidium_cuvillieri        | 0    | 0    | 0    | 0    | 0    | 0    | 0    | 0    | 0    | 0    | 0    | 0    | 0    | 0    | 0    | 0    | 0    | 0    | 9    | 4    | 7    | 4    | 0    |
| Elphidium_incertum          | 0    | 0    | 0    | 0    | 0    | 0    | 0    | 0    | 0    | 0    | 0    | 0    | 0    | 0    | 0    | 0    | 2    | 0    | 0    | 0    | 0    | 0    | 0    |
| Elphidium_macellum          | 0    | 0    | 0    | 0    | 0    | 0    | 0    | 0    | 0    | 0    | 0    | 0    | 0    | 0    | 0    | 0    | 0    | 0    | 2    | 0    | 0    | 0    | 11   |
| Elphidium_punctatum         | 0    | 0    | 6    | 2    | 0    | 0    | 0    | 0    | 0    | 0    | 0    | 0    | 0    | 0    | 0    | 0    | 0    | 0    | 1    | 0    | 0    | 0    | 3    |
| Elphidium_sp                | 0    | 0    | 0    | 3    | 0    | 1    | 0    | 1    | 11   | 10   | 15   | 17   | 3    | 1    | 1    | 2    | 0    | 1    | 1    | 5    | 0    | 0    | 0    |
| Fissurina_marginata         | 0    | 0    | 0    | 0    | 0    | 0    | 1    | 0    | 0    | 0    | 0    | 0    | 0    | 0    | 0    | 0    | 0    | 0    | 0    | 0    | 0    | 0    | 0    |
| Fissurina_neptuni           | 2    | 0    | 0    | 0    | 0    | 0    | 0    | 0    | 0    | 1    | 0    | 0    | 0    | 0    | 0    | 0    | 0    | 0    | 0    | 0    | 0    | 0    | 0    |
| Fissurina_orbignyana        | 0    | 1    | 1    | 0    | 0    | 0    | 2    | 0    | 0    | 0    | 0    | 0    | 0    | 0    | 0    | 0    | 0    | 0    | 0    | 0    | 0    | 0    | 0    |
| Fissurina_sp                | 0    | 0    | 0    | 0    | 0    | 0    | 0    | 1    | 3    | 0    | 2    | 0    | 1    | 1    | 0    | 0    | 0    | 0    | 0    | 0    | 0    | 0    | 0    |
| Globobulimina_affinis       | 6    | 8    | 9    | 13   | 14   | 5    | 1    | 2    | 1    | 0    | 0    | 0    | 0    | 0    | 0    | 0    | 0    | 0    | 0    | 0    | 0    | 0    | 0    |
| Globocassidulina_crassa     | 0    | 0    | 1    | 0    | 1    | 0    | 0    | 0    | 1    | 0    | 0    | 0    | 0    | 0    | 1    | 0    | 0    | 0    | 0    | 0    | 0    | 0    | 0    |
| Globocassidulina_subglobosa | 16   | 4    | 3    | 11   | 6    | 1    | 5    | 4    | 2    | 3    | 2    | 2    | 11   | 11   | 2    | 8    | 1    | 1    | 14   | 0    | 9    | 14   | 3    |
| Globulina_sp                | 0    | 0    | 0    | 0    | 0    | 0    | 0    | 0    | 0    | 0    | 2    | 0    | 0    | 0    | 0    | 0    | 0    | 4    | 0    | 0    | 0    | 0    | 0    |
| Gyroidina_altiformis        | 0    | 0    | 0    | 0    | 1    | 0    | 0    | 0    | 0    | 0    | 0    | 0    | 0    | 0    | 0    | 0    | 0    | 0    | 0    | 0    | 0    | 0    | 0    |
| Gyroidina_umbonata          | 11   | 4    | 8    | 7    | 9    | 10   | 10   | 9    | 4    | 0    | 3    | 0    | 1    | 0    | 0    | 0    | 0    | 2    | 1    | 0    | 3    | 0    | 4    |
| Hanzawaia_boueana           | 2    | 0    | 2    | 0    | 1    | 0    | 1    | 0    | 0    | 0    | 0    | 0    | 0    | 0    | 0    | 0    | 0    | 0    | 0    | 0    | 0    | 0    | 0    |
| Hyalinea_balthica           | 12   | 38   | 33   | 16   | 20   | 27   | 24   | 0    | 11   | 14   | 24   | 24   | 10   | 14   | 20   | 26   | 47   | 21   | 12   | 17   | 12   | 18   | 21   |
| Lagena_striata              | 1    | 0    | 2    | 0    | 3    | 0    | 0    | 0    | 0    | 0    | 3    | 0    | 0    | 0    | 0    | 0    | 0    | 0    | 0    | 0    | 0    | 0    | 0    |
| Lagenammia_atlantica        | 0    | 0    | 0    | 0    | 0    | 0    | 0    | 0    | 0    | 0    | 0    | 0    | 1    | 0    | 0    | 0    | 0    | 1    | 0    | 0    | 0    | 0    | 0    |
| Lenticulina_orbicularis     | 2    | 1    | 0    | 0    | 2    | 0    | 1    | 0    | 0    | 0    | 2    | 0    | 0    | 0    | 0    | 0    | 0    | 1    | 0    | 2    | 1    | 1    | 0    |
| Lenticulina_sp              | 1    | 0    | 0    | 0    | 0    | 0    | 0    | 0    | 0    | 0    | 0    | 0    | 0    | 0    | 0    | 0    | 0    | 0    | 0    | 0    | 0    | 0    | 0    |
| Lobatula_lobatula           | 0    | 0    | 2    | 1    | 1    | 2    | 0    | 2    | 2    | 0    | 0    | 1    | 1    | 2    | 2    | 1    | 0    | 1    | 2    | 4    | 1    | 1    | 2    |
| Marginulina_sp              | 0    | 0    | 0    | 0    | 1    | 0    | 0    | 0    | 0    | 0    | 0    | 0    | 0    | 0    | 0    | 0    | 0    | 0    | 0    | 0    | 0    | 0    | 0    |
| Melonis_barleeianum         | 13   | 18   | 9    | 11   | 21   | 10   | 15   | 16   | 15   | 14   | 13   | 17   | 10   | 27   | 29   | 37   | 20   | 13   | 3    | 0    | 35   | 31   | 24   |
| Melonis_pompilioides        | 3    | 2    | 0    | 3    | 4    | 3    | 4    | 5    | 4    | 5    | 5    | 7    | 9    | 12   | 10   | 13   | 3    | 10   | 8    | 34   | 19   | 9    | 5    |
| Miliolinella_sp             | 2    | 0    | 0    | 0    | 0    | 1    | 0    | 0    | 1    | 0    | 0    | 1    | 0    | 0    | 2    | 1    | 0    | 0    | 0    | 0    | 0    | 0    | 0    |
| Neolenticulina_variabilis   | 0    | 2    | 0    | 0    | 0    | 0    | 0    | 1    | 0    | 0    | 2    | 0    | 0    | 0    | 0    | 0    | 0    | 0    | 0    | 0    | 1    | 0    | 0    |
| Peneroplis_sp               | 0    | 0    | 0    | 0    | 0    | 0    | 0    | 0    | 0    | 0    | 0    | 0    | 0    | 0    | 0    | 0    | 0    | 0    | 0    | 0    | 4    | 0    | 0    |
| Porosonion_granosum         | 0    | 0    | 0    | 0    | 0    | 1    | 0    | 1    | 0    | 6    | 5    | 0    | 5    | 5    | 0    | 2    | 9    | 7    | 9    | 7    | 6    | 1    | 17   |
| Pseudoclavulina_crustata    | 0    | 0    | 0    | 0    | 1    | 0    | 0    | 1    | 0    | 0    | 1    | 0    | 0    | 0    | 0    | 0    | 0    | 0    | 0    | 0    | 1    | 0    | 0    |
| Pyrgo_elongata              | 0    | 0    | 0    | 0    | 1    | 0    | 0    | 0    | 0    | 0    | 0    | 0    | 0    | 1    | 0    | 0    | 0    | 0    | 0    | 0    | 0    | 0    | 1    |
| Pyrgo_inornata              | 0    | 0    | 1    | 1    | 0    | 0    | 3    | 1    | 4    | 0    | 1    | 3    | 2    | 0    | 4    | 1    | 0    | 0    | 2    | 3    | 2    | 2    | 1    |
| Pyrgo_sp                    | 0    | 1    | 0    | 1    | 0    | 0    | 0    | 0    | 0    | 1    | 0    | 0    | 1    | 0    | 1    | 0    | 0    | 0    | 2    | 0    | 3    | 1    | 0    |
| Quinqueloculina_bosciana    | 0    | 0    | 0    | 0    | 0    | 0    | 0    | 0    | 0    | 1    | 0    | 0    | 0    | 0    | 0    | 0    | 0    | 0    | 0    | 0    | 0    | 0    | 0    |
| Quinqueloculina_padana      | 2    | 5    | 0    | 2    | 9    | 1    | 7    | 6    | 4    | 1    | 3    | 4    | 4    | 6    | 6    | 3    | 0    | 6    | 9    | 4    | 2    | 3    | 5    |
| Quinqueloculina_jugosa      | 0    | 0    | 0    | 0    | 0    | 0    | 0    | 0    | 0    | 0    | 0    | 0    | 0    | 0    | 1    | 0    | 0    | 0    | 0    | 0    | 0    | 0    | 0    |
| Rectuvigerina_phlegeri      | 2    | 0    | 0    | 0    | 0    | 0    | 0    | 0    | 1    | 1    | 0    | 0    | 0    | 0    | 0    | 0    | 0    | 0    | 0    | 0    | 0    | 0    | 0    |
| Rosalina_sp                 | 0    | 0    | 0    | 0    | 0    | 0    | 0    | 0    | 0    | 1    | 0    | 0    | 0    | 0    | 0    | 0    | 0    | 0    | 0    | 0    | 0    | 0    | 0    |
| Rotalinoides_gaimardii      | 0    | 0    | 0    | 0    | 0    | 0    | 1    | 0    | 0    | 0    | 0    | 0    | 2    | 3    | 0    | 7    | 0    | 0    | 5    | 12   | 8    | 20   | 3    |
| Sigmillopsis_schlumbergeri  | 0    | 6    | 6    | 1    | 1    | 1    | 1    | 6    | 4    | 2    | 1    | 0    | 0    | 1    | 1    | 6    | 3    | 1    | 2    | 1    | 0    | 1    | 0    |
| Sphaeroidina_bulloides      | 2    | 3    | 2    | 0    | 2    | 1    | 0    | 0    | 0    | 1    | 0    | 0    | 0    | 0    | 0    | 0    | 0    | 0    | 0    | 0    | 1    | 1    | 2    |
| Spiroloculina_excavata      | 0    | 0    | 0    | 0    | 0    | 1    | 0    | 0    | 2    | 0    | 2    | 0    | 2    | 0    | 0    | 0    | 0    | 0    | 0    | 0    | 0    | 0    | 0    |
| Spiroplectinella_wrighti    | 2    | 9    | 8    | 20   | 6    | 18   | 8    | 14   | 10   | 15   | 12   | 25   | 18   | 12   | 25   | 32   | 13   | 19   | 28   | 29   | 11   | 28   | 0    |
| Textularia_calva            | 9    | 5    | 0    | 4    | 0    | 2    | 2    | 3    | 4    | 4    | 0    | 3    | 0    | 3    | 4    | 4    | 0    | 0    | 11   | 0    | 8    | 0    | 7    |
| Textularia_conica           | 0    | 0    | 0    | 0    | 0    | 0    | 0    | 0    | 0    | 0    | 0    | 0    | 0    | 0    | 0    | 0    | 0    | 0    | 3    | 0    | 0    | 0    | 0    |
| Textularia_pala             | 0    | 0    | 0    | 0    | 0    | 0    | 0    | 0    | 0    | 0    | 0    | 0    | 0    | 0    | 0    | 0    | 0    | 0    | 1    | 6    | 3    | 4    |      |
| Textularia_pseudorugosa     | 0    | 0    | 0    | 0    | 0    | 2    | 0    | 0    | 0    | 0    | 0    | 0    | 0    | 0    | 0    | 1    | 0    | 0    | 2    |      |      |      |      |

| SPECIES_SAMPLES                    | 2013      | 2005      | 1997      | 1989      | 1981      | 1973      | 1965      | 1958      | 1950      | 1942      | 1936      | 1928      | 1922      | 1918      | 1913      | 1906      | 1876      | 1853      | 1823      | 1794      | 1765      | 1735      | 1686      |
|------------------------------------|-----------|-----------|-----------|-----------|-----------|-----------|-----------|-----------|-----------|-----------|-----------|-----------|-----------|-----------|-----------|-----------|-----------|-----------|-----------|-----------|-----------|-----------|-----------|
| <i>Adelosina_sp</i>                | 0         | 0         | 0         | 0.4545455 | 0         | 1.1152416 | 0.7936508 | 0         | 0.3891051 | 0.3937008 | 1.0526316 | 0.7326007 | 0         | 0.8097166 | 0         | 0.7042254 | 0         | 1.1673152 | 0.3521127 | 0         | 0         | 0.7968127 | 0.7352941 |
| <i>Ammodiscus_planorbis</i>        | 0         | 0         | 0         | 0         | 0.3816794 | 0         | 0         | 0         | 0.3891051 | 0         | 0.7017544 | 0         | 0         | 0         | 0         | 0         | 0         | 0         | 0         | 0         | 0         | 0         | 0         |
| <i>Ammonia_beccarii</i>            | 0.4761905 | 2.6315789 | 2.3255814 | 5.4545455 | 3.0534351 | 3.7174721 | 3.1746032 | 5.0420168 | 4.6692607 | 4.7244094 | 2.1052632 | 4.3956044 | 6.3492063 | 6.0728745 | 1.8604651 | 4.2253521 | 11.553785 | 4.6692607 | 10.56338  | 0.3610108 | 0         | 0         | 5.1470588 |
| <i>Amphicoryna_scalaris</i>        | 0.4761905 | 0.3759398 | 0         | 0         | 0         | 0         | 0.3968254 | 0         | 1.1673152 | 0.3937008 | 0.3508772 | 0         | 0.3968254 | 0         | 0.3891051 | 0         | 0.3891051 | 0         | 0.3610108 | 0         | 0.7968127 | 0         | 0         |
| <i>Asterigerinata_mamilla</i>      | 0         | 0         | 0         | 0         | 0         | 0         | 0         | 0.4201681 | 0         | 0         | 0         | 0         | 0         | 0         | 0         | 0         | 0         | 0         | 0         | 0         | 0.3984064 | 0         | 0         |
| <i>Bigenenerina_nodosaria</i>      | 0         | 2.6315789 | 4.2635659 | 6.3636364 | 2.2900763 | 5.5762082 | 3.1746032 | 5.0420168 | 3.8910506 | 5.1181102 | 3.5087719 | 2.1978022 | 3.968254  | 2.8340081 | 1.8604651 | 3.5211268 | 1.5936255 | 0.7782101 | 0         | 1.0830325 | 1.0600707 | 1.1952191 | 3.6764706 |
| <i>Bolivina_alata</i>              | 0.4761905 | 2.6315789 | 1.9379845 | 0.4545455 | 4.9618321 | 5.204461  | 2.7777778 | 4.2016807 | 6.614786  | 2.3622047 | 6.6666667 | 2.5641026 | 5.1587302 | 4.4534413 | 5.1162791 | 4.2253521 | 3.5856574 | 1.9455253 | 2.1126761 | 7.5812274 | 7.0671378 | 5.1792829 | 3.6764706 |
| <i>Bolivina_catanensis</i>         | 15.238095 | 4.5112782 | 3.875969  | 0         | 3.4351145 | 0.7434944 | 0         | 0         | 0         | 0         | 0.7017544 | 1.0989011 | 1.5873016 | 1.2145749 | 0         | 0.3521127 | 1.5936255 | 1.5564202 | 0.7042254 | 0.3610108 | 0.3533569 | 0         | 0         |
| <i>Bolivina_pseudoplicata</i>      | 0.4761905 | 0         | 0         | 0         | 0         | 0         | 0         | 0         | 0         | 0         | 0         | 0         | 0         | 0         | 0         | 0         | 0         | 0         | 0         | 0         | 0         | 0         | 0         |
| <i>Bolivina_spathulata</i>         | 0         | 0         | 0         | 0         | 0         | 0         | 0         | 0         | 0         | 0         | 0         | 0         | 0         | 0         | 0         | 0         | 0         | 0         | 0         | 0         | 0         | 0.3676471 | 0         |
| <i>Bulimina_costata</i>            | 0.4761905 | 1.1278195 | 0.3875969 | 1.8181818 | 1.1450382 | 1.4869888 | 0         | 0.4201681 | 0.7782101 | 0.3937008 | 0         | 0         | 0         | 0.4048583 | 0.4651163 | 0.7042254 | 0.3984064 | 0.3891051 | 0         | 0         | 1.4134276 | 0.3984064 | 0.3676471 |
| <i>Bulimina_elongata</i>           | 1.4285714 | 0         | 0         | 0         | 0         | 0         | 0         | 1.2605042 | 0         | 0         | 0         | 0         | 0         | 0         | 0         | 0         | 0         | 0         | 0         | 0         | 0         | 0         | 0         |
| <i>Bulimina_gibba</i>              | 5.7142857 | 4.5112782 | 6.5891473 | 2.2727273 | 6.4885496 | 9.6654275 | 14.68254  | 13.865546 | 17.898833 | 24.80315  | 21.052632 | 29.67033  | 18.650794 | 14.17004  | 8.372093  | 2.4647887 | 3.9840637 | 3.1128405 | 2.1126761 | 8.3032491 | 8.4805654 | 7.1713147 | 10.294118 |
| <i>Bulimina_marginata</i>          | 9.5238095 | 3.3834586 | 6.2015504 | 5         | 4.5801527 | 7.8066914 | 4.3650794 | 7.1428571 | 3.1128405 | 2.7559055 | 1.0526316 | 1.0989011 | 2.3809524 | 5.6680162 | 5.5813953 | 6.6901408 | 3.9840637 | 7.0038911 | 8.8028169 | 10.469314 | 6.7137809 | 3.9840637 | 9.1911765 |
| <i>Cassidulina_carinata</i>        | 9.5238095 | 15.037594 | 7.751938  | 11.818182 | 11.832061 | 9.2936803 | 10.714286 | 6.7226891 | 6.614786  | 8.6614173 | 9.4736842 | 7.3260073 | 7.1428571 | 5.6680162 | 10.697674 | 11.619718 | 12.350598 | 16.731518 | 14.43662  | 8.6642599 | 4.9469965 | 4.3824701 | 7.3529412 |
| <i>Cibicides_pseudoungerianus</i>  | 0         | 0         | 0         | 0         | 0         | 0.3717472 | 0.7936508 | 0.4201681 | 0         | 0         | 0         | 0         | 0         | 0         | 0         | 0         | 0         | 0         | 0         | 0.3533569 | 0         | 1.1029412 | 0         |
| <i>Dentalina_leguminiformis</i>    | 0         | 0.3759398 | 0.7751938 | 0         | 0         | 0         | 0         | 0         | 0.3891051 | 0         | 0         | 0         | 0         | 0         | 0         | 0         | 0         | 0         | 0         | 0         | 0         | 0         | 0         |
| <i>Dentalina_sp</i>                | 0         | 0         | 0.7751938 | 0         | 0         | 0         | 0         | 0         | 0.3891051 | 0         | 0.3508772 | 0         | 0.3968254 | 0         | 0         | 0         | 0         | 0         | 0         | 0         | 0         | 0         | 0         |
| <i>Elphidium_crispum</i>           | 0         | 0         | 0         | 0         | 0         | 0         | 0         | 0         | 2.7237354 | 3.5433071 | 1.754386  | 3.2967033 | 4.7619048 | 5.2631579 | 2.3255814 | 1.7605634 | 3.9840637 | 5.8365759 | 0.7042254 | 6.1371841 | 3.5335689 | 5.9760956 | 0         |
| <i>Elphidium_cuvillieri</i>        | 0         | 0         | 0         | 0         | 0         | 0         | 0         | 0         | 0         | 0         | 0         | 0         | 0         | 0         | 0         | 0         | 0         | 0         | 3.1690141 | 1.4440433 | 2.4734982 | 1.5936255 | 0         |
| <i>Elphidium_incertum</i>          | 0         | 0         | 0         | 0         | 0         | 0         | 0         | 0         | 0         | 0         | 0         | 0         | 0         | 0         | 0         | 0         | 0.7968127 | 0         | 0         | 0         | 0         | 0         | 0         |
| <i>Elphidium_macellum</i>          | 0         | 0         | 0         | 0         | 0         | 0         | 0         | 0         | 0         | 0         | 0         | 0         | 0         | 0         | 0         | 0         | 0         | 0         | 0.7042254 | 0         | 0         | 0         | 4.0441176 |
| <i>Elphidium_punctatum</i>         | 0         | 0         | 2.3255814 | 0.9090909 | 0         | 0         | 0         | 0         | 0         | 0         | 0         | 0         | 0         | 0         | 0         | 0         | 0         | 0         | 0.3521127 | 0         | 0         | 0         | 1.1029412 |
| <i>Elphidium_sp</i>                | 0         | 0         | 0         | 1.3636364 | 0         | 0.3717472 | 0         | 0.4201681 | 4.2801556 | 3.9370079 | 5.2631579 | 6.2271062 | 1.1904762 | 0.4048583 | 0.4651163 | 0.7042254 | 0         | 0.3891051 | 0.3521127 | 1.8050542 | 0         | 0         | 0         |
| <i>Fissurina_marginata</i>         | 0         | 0         | 0         | 0         | 0         | 0         | 0.3968254 | 0         | 0         | 0         | 0         | 0         | 0         | 0         | 0         | 0         | 0         | 0         | 0         | 0         | 0         | 0         | 0         |
| <i>Fissurina_neptuni</i>           | 0.952381  | 0         | 0         | 0         | 0         | 0         | 0         | 0         | 0         | 0.3937008 | 0         | 0         | 0         | 0         | 0         | 0         | 0         | 0         | 0         | 0         | 0         | 0         | 0         |
| <i>Fissurina_orbignyana</i>        | 0         | 0.3759398 | 0.3875969 | 0         | 0         | 0         | 0.7936508 | 0         | 0         | 0         | 0         | 0         | 0         | 0         | 0         | 0         | 0         | 0         | 0         | 0         | 0         | 0         | 0         |
| <i>Fissurina_sp</i>                | 0         | 0         | 0         | 0         | 0         | 0         | 0         | 0.4201681 | 1.1673152 | 0         | 0.7017544 | 0         | 0.3968254 | 0.4048583 | 0         | 0         | 0         | 0         | 0         | 0         | 0         | 0         | 0         |
| <i>Globobulimina_affinis</i>       | 2.8571429 | 3.0075188 | 3.4883721 | 5.9090909 | 5.3435115 | 1.8587361 | 0.3968254 | 0.8403361 | 0.3891051 | 0         | 0         | 0         | 0         | 0         | 0.4651163 | 0         | 0         | 0         | 0         | 0         | 0         | 0         | 0         |
| <i>Globocassidulina_crassa</i>     | 0         | 0         | 0.3875969 | 0         | 0.3816794 | 0         | 0         | 0         | 0.3891051 | 0         | 0         | 0         | 0         | 0         | 0         | 0         | 0         | 0         | 0         | 0         | 0         | 0         | 0         |
| <i>Globocassidulina_subglobosa</i> | 7.6190476 | 1.5037594 | 1.1627907 | 5         | 2.2900763 | 0.3717472 | 1.984127  | 1.6806723 | 0.7782101 | 1.1811024 | 0.7017544 | 0.7326007 | 4.3650794 | 4.4534413 | 0.9302326 | 2.8169014 | 0.3984064 | 0.3891051 | 4.9295775 | 0         | 3.180212  | 5.5776892 | 1.1029412 |
| <i>Globulina_sp</i>                | 0         | 0         | 0         | 0         | 0         | 0         | 0         | 0         | 0         | 0         | 0.7017544 | 0         | 0         | 0         | 0         | 0         | 0         | 1.5564202 | 0         | 0         | 0         | 0         | 0         |
| <i>Gyroidina_altiformis</i>        | 0         | 0         | 0         | 0         | 0.3816794 | 0         | 0         | 0         | 0         | 0         | 0         | 0         | 0         | 0         | 0         | 0         | 0         | 0         | 0         | 0         | 0         | 0         | 0         |
| <i>Gyroidina_umbonata</i>          | 5.2380952 | 1.5037594 | 3.1007752 | 3.1818182 | 3.4351145 | 3.7174721 | 3.968254  | 3.7815126 | 1.5564202 | 0         | 1.0526316 | 0.3968254 | 0         | 0         | 0         | 0         | 0.7782101 | 0.3521127 | 0         | 1.0600707 | 0         | 1.4705882 | 0         |
| <i>Hanzawaia_boueana</i>           | 0.952381  | 0         | 0.7751938 | 0         | 0.3816794 | 0         | 0.3968254 | 0         | 0         | 0         | 0         | 0         | 0         | 0         | 0         | 0         | 0         | 0         | 0         | 0         | 0         | 0         | 0         |
| <i>Hyalinea_balthica</i>           | 5.7142857 | 14.285714 | 12.790698 | 7.2727273 | 7.6335878 | 10.037175 | 9.5238095 | 0         | 4.2801556 | 5.511811  | 8.4210526 | 8.7912088 | 3.968254  | 5.6680162 | 9.3023256 | 9.1549296 | 18.7251   | 8.1712062 | 4.2253521 | 6.1371841 | 4.2402827 | 7.1713147 | 7.7205882 |
| <i>Lagena_striata</i>              | 0.4761905 | 0         | 0.7751938 | 0         | 1.1450382 | 0         | 0         | 0         | 0         | 0         | 1.0526316 | 0         | 0         | 0         | 0         | 0         | 0         | 0         | 0         | 0         | 0         | 0         | 0         |
| <i>Lagenammina_atlantica</i>       | 0         | 0         | 0         | 0         | 0         | 0         | 0         | 0         | 0         | 0         | 0         | 0         | 0.3968254 | 0         | 0         | 0         | 0.3891051 | 0         | 0         | 0         | 0         | 0         | 0         |
| <i>Lenticulina_orbicularis</i>     | 0.952381  | 0.3759398 | 0         | 0         | 0.7633588 | 0         | 0.3968254 | 0         | 0         | 0.7017544 | 0         | 0         | 0         | 0         | 0         | 0         | 0.3891051 | 0         | 0.7220217 | 0.3533569 | 0.3984064 | 0         | 0         |
| <i>Lenticulina_sp</i>              | 0.4761905 | 0         | 0         | 0         | 0         | 0         | 0         | 0         | 0         | 0         | 0         | 0         | 0         | 0         | 0         | 0         | 0         | 0         | 0         | 0         | 0         | 0         | 0         |
| <i>Lobatula_lobatula</i>           | 0         | 0         | 0.7751938 | 0.4545455 | 0.3816794 | 0.7434944 | 0         | 0.8403361 | 0.7782101 | 0         | 0         | 0.3663004 | 0.3968254 | 0.8097166 | 0.9302326 | 0.3521127 | 0         | 0.3891051 | 0.7042254 | 1.4440433 | 0.3533569 | 0.3984064 | 0.7352941 |
| <i>Marginulina_sp</i>              | 0         | 0         | 0         | 0         | 0.3816794 | 0         | 0         | 0         | 0         | 0         | 0         | 0         | 0         | 0         | 0         | 0         | 0         | 0         | 0         | 0         | 0         | 0         | 0         |
| <i>Melonis_barleeanum</i>          | 6.1904762 | 6.7669173 | 3.4883721 | 5         | 8.0152672 | 3.7174721 | 5.952381  | 6.7226891 | 5.5365759 | 5.511811  | 4.5614035 | 6.2271062 | 3.968254  | 10.931174 | 13.488372 | 13.028169 | 7.9681275 | 5.0583658 | 1.056338  | 0         | 12.367491 | 12.350598 | 8.8235294 |
| <i>Melonis_pompiilioides</i>       | 1.4285714 | 0.7518797 | 0         | 1.3636364 | 1.5267176 | 1.1152416 | 1.5873016 | 2.1008403 | 1.5564202 | 1.754386  | 1.9685039 | 2.5641026 | 3.5714286 | 4.8582996 | 4.6511628 | 4.5774648 | 1.1952191 | 3.8910506 | 2.8169014 | 12.274368 | 6.7137809 | 3.5856574 | 1.8382353 |
| <i>Miliolinella_sp</i>             | 0.952381  | 0         | 0         | 0         | 0         | 0.3717472 | 0         | 0         | 0.3891051 | 0         | 0.3508772 | 0         | 0         | 0         | 0.9302326 | 0.3521127 | 0         | 0         | 0         | 0         | 0         | 0         | 0         |
| <i>Neolenticulina_variabilis</i>   | 0         | 0.7518797 | 0         | 0         | 0         | 0         | 0         | 0.4201681 | 0         | 0.7017544 | 0         | 0         | 0         | 0         | 0         | 0         | 0         | 0         | 0         | 0         | 0.3533569 | 0         | 0         |
| <i>Peneroplis_sp</i>               | 0         | 0         | 0         | 0         | 0         | 0         | 0         | 0         | 0         | 0         | 0         | 0         | 0         | 0         | 0         | 0         | 0         | 0         | 0         | 1.4134276 | 0         | 0         | 0         |
| <i>Porosonion_granosum</i>         | 0         | 0         | 0         | 0         | 0         | 0.3717472 | 0         | 0.4201681 | 0         | 2.3622047 | 1.754386  | 0         | 1.984127  | 2.0242915 | 0         | 0.7042254 | 3.5856574 | 2.7237354 | 3.1690141 | 2.5270758 | 2.1201413 | 0.3984064 | 6.25      |
| <i>Pseudoclavulina_crustata</i>    | 0         | 0         | 0         | 0         | 0.3816794 | 0         | 0         | 0.4201681 | 0         | 0.3508772 | 0         | 0         | 0         | 0         | 0         | 0         | 0         | 0         | 0         | 0.3533569 | 0         | 0         | 0         |
| <i>Pyrgo_elongata</i>              | 0         | 0         | 0         | 0         | 0.3816794 | 0         | 0         | 0         | 0         | 0         | 0         | 0         | 0         | 0.4048583 | 0         | 0.3521127 | 0         | 0         | 0         | 0         | 0         | 0.3676471 | 0         |
| <i>Pyrgo_inornata</i>              | 0         | 0.3875969 | 0.4545455 | 0         | 0         | 1.1904762 | 0.4201681 | 1.5564202 | 0         | 0.3508772 | 1.0989011 | 0.7936508 | 0         | 1.8604651 | 0.3521127 | 0         | 0         | 0.7042254 | 1.0830325 | 0.7067138 | 0.7968127 | 0.3676471 | 0         |
| <i>Pyrgo_sp</i>                    | 0         | 0.3759398 | 0         | 0.4545455 | 0         | 0         | 0         | 0         | 0         | 0.3937008 | 0         | 0.3968254 | 0         | 0.4651163 | 0         | 0         | 0         | 0.7042254 | 0         | 1.0600707 | 0.3984064 | 0         | 0         |
| <i>Quinqueloculina_bosciana</i>    | 0         | 0         | 0         | 0         | 0         | 0         | 0         | 0         | 0         | 0         | 0.3508772 | 0         | 0         | 0         | 0         | 0         | 0         | 0         | 0         | 0         | 0         | 0         | 0         |
| <i>Quinqueloculina_padana</i>      | 0.952381  | 1.87      |           |           |           |           |           |           |           |           |           |           |           |           |           |           |           |           |           |           |           |           |           |

| SPECIES_SAMPLES             | 2013      | 2005      | 1997      | 1989      | 1981      | 1973      | 1965      | 1958      | 1950      | 1942      | 1936      | 1928      | 1922      | 1918      | 1913      | 1906      | 1876      | 1853      | 1823      | 1794      | 1765      | 1735      | 1686      |
|-----------------------------|-----------|-----------|-----------|-----------|-----------|-----------|-----------|-----------|-----------|-----------|-----------|-----------|-----------|-----------|-----------|-----------|-----------|-----------|-----------|-----------|-----------|-----------|-----------|
| Valvulinera bradyana        | 8.0952381 | 6.7669173 | 5.4263566 | 3.6363636 | 8.3969466 | 10.037175 | 9.1269841 | 11.764706 | 5.4474708 | 5.9055118 | 11.22807  | 7.3260073 | 14.285714 | 10.931174 | 11.627907 | 11.267606 | 16.334661 | 21.789883 | 14.084507 | 9.0252708 | 14.840989 | 13.545817 | 15.808824 |
| Bulimina gibba              | 5.7142857 | 4.5112782 | 6.5891473 | 2.2727273 | 6.4885496 | 9.6654275 | 14.68254  | 13.865546 | 17.898833 | 24.80315  | 21.052632 | 29.67033  | 18.650794 | 14.17004  | 8.372093  | 2.4647887 | 3.9840637 | 3.1128405 | 2.1126761 | 8.3032491 | 8.4805654 | 7.1713147 | 10.294118 |
| Cassidulina carinata        | 9.5238095 | 15.037594 | 7.751938  | 11.818182 | 11.832061 | 9.2936803 | 10.714286 | 6.7226891 | 6.614786  | 8.6614173 | 9.4736842 | 7.3260073 | 7.1428571 | 5.6680162 | 10.697674 | 11.619718 | 12.350598 | 16.731518 | 14.43662  | 8.6642599 | 4.9469965 | 4.3824701 | 7.3529412 |
| Hyalinea balthica           | 5.7142857 | 14.285714 | 12.790698 | 7.2727273 | 7.6335878 | 10.037175 | 9.5238095 | 0         | 4.2801556 | 5.511811  | 8.4210526 | 8.7912088 | 3.968254  | 5.6680162 | 9.3023256 | 9.1549296 | 18.7251   | 8.1712062 | 4.2253521 | 6.1371841 | 4.2402827 | 7.1713147 | 7.7205882 |
| Melonis barleeanum          | 6.1904762 | 6.7669173 | 3.4883721 | 5         | 8.0152672 | 3.7174721 | 5.952381  | 6.7226891 | 5.8365759 | 5.511811  | 4.5614035 | 6.2271062 | 3.968254  | 10.931174 | 13.488372 | 13.028169 | 7.9681275 | 5.0583658 | 1.056338  | 0         | 12.367491 | 12.350598 | 8.8235294 |
| Spiroplectinella wrighti    | 0.952381  | 3.3834586 | 3.1007752 | 0.9090909 | 6.6914498 | 3.1746032 | 5.8823529 | 3.8910506 | 5.9055118 | 4.2105263 | 9.1575092 | 7.1428571 | 4.8582996 | 11.627907 | 11.267606 | 5.1792829 | 7.3929961 | 9.8591549 | 10.469314 | 3.8869258 | 11.155378 | 0         | 0         |
| Bulimina marginata          | 9.5238095 | 3.3834586 | 6.2015504 | 5         | 4.5801527 | 7.8066914 | 4.3650794 | 7.1428571 | 3.1128405 | 2.7559055 | 1.0526316 | 1.0989011 | 2.3809524 | 5.6680162 | 5.5813953 | 6.6901408 | 3.9840637 | 7.0038911 | 8.8028169 | 10.469314 | 6.7137809 | 3.9840637 | 9.1911765 |
| Uvigerina mediterranea      | 6.1904762 | 10.902256 | 18.992248 | 13.636364 | 11.832061 | 8.9219331 | 12.301587 | 5.8823529 | 8.9494163 | 6.2992126 | 1.0526316 | 1.0989011 | 1.1904762 | 0.8097166 | 0         | 0         | 0.3984064 | 0.3891051 | 0.3521127 | 2.5270758 | 0.7067138 | 0         | 0         |
| Ammonia beccarii            | 0.4761905 | 2.6315789 | 2.3255814 | 5.4545455 | 3.0534351 | 3.7174721 | 3.1746032 | 5.0420168 | 4.6692607 | 4.7244094 | 2.1052632 | 4.3956044 | 6.3492063 | 6.0728745 | 1.8604651 | 4.2253521 | 11.553785 | 4.6692607 | 10.56338  | 0.3610108 | 0         | 0         | 5.1470588 |
| Bolivina alata              | 0.4761905 | 2.6315789 | 1.9379845 | 0.4545455 | 4.9618321 | 5.204461  | 2.7777778 | 4.2016807 | 6.614786  | 2.3622047 | 6.6666667 | 2.5641026 | 5.1587302 | 4.4534413 | 5.1162791 | 4.2253521 | 3.5856574 | 1.9455253 | 2.1126761 | 7.5812274 | 7.0671378 | 5.1792829 | 3.6764706 |
| Melonis pompilioides        | 1.4285714 | 0.7518797 | 0         | 1.3636364 | 1.5267176 | 1.1152416 | 1.5873016 | 2.1008403 | 1.5564202 | 1.9685039 | 1.754386  | 2.5641026 | 3.5714286 | 4.8582996 | 4.6511628 | 4.5774648 | 1.1952191 | 3.8910506 | 2.8169014 | 12.274368 | 6.7137809 | 3.5856574 | 1.8382353 |
| Bigenerina nodosaria        | 0         | 2.6315789 | 4.2635659 | 6.3636364 | 2.2900763 | 5.5762082 | 3.1746032 | 5.0420168 | 3.8910506 | 5.1181102 | 3.5087719 | 2.1978022 | 3.968254  | 2.8340081 | 1.8604651 | 3.5211268 | 1.5936255 | 0.7782101 | 0         | 1.0830325 | 1.0600707 | 1.1952191 | 3.6764706 |
| Globocassidulina subglobosa | 7.6190476 | 1.5037594 | 1.1627907 | 5         | 2.2900763 | 0.3717472 | 1.984127  | 1.6806723 | 0.7782101 | 1.1811024 | 0.7017544 | 0.7326007 | 4.3650794 | 4.4534413 | 0.9302326 | 2.8169014 | 0.3984064 | 0.3891051 | 4.9295775 | 0         | 3.180212  | 5.5776892 | 1.1029412 |
| Elphidium crispum           | 0         | 0         | 0         | 0         | 0         | 0         | 0         | 0         | 7.2737354 | 3.5433071 | 1.754386  | 3.2967033 | 4.7619048 | 5.2631579 | 2.3255814 | 1.7605634 | 3.9840637 | 5.8365759 | 0.7042254 | 6.1371841 | 3.5335689 | 5.9760956 | 0         |
| Uvigerina peregrina         | 0         | 4.887218  | 4.6511628 | 5.4545455 | 1.9083969 | 3.7174721 | 3.5714286 | 7.1428571 | 3.8910506 | 3.1496063 | 1.0526316 | 1.0989011 | 1.5873016 | 1.2145749 | 0         | 0.3521127 | 1.1952191 | 0         | 0.3521127 | 0.7220217 | 0         | 0.3984064 | 0         |
| Bolivina catanensis         | 15.238095 | 4.5112782 | 3.875969  | 0         | 3.4351145 | 0.7434944 | 0         | 0         | 0         | 0         | 0.7017544 | 1.0989011 | 1.5873016 | 1.2145749 | 0         | 0.3521127 | 1.5936255 | 1.5564202 | 0.7042254 | 0.3610108 | 0.3533569 | 0         | 0         |
| Quinqueloculina padana      | 0.952381  | 1.8796992 | 0         | 0.9090909 | 3.4351145 | 0.3717472 | 2.7777778 | 2.5210084 | 1.5564202 | 0.3937008 | 1.0526316 | 1.4652015 | 1.5873016 | 2.4291948 | 2.7906977 | 1.056338  | 0         | 2.3346304 | 3.1690141 | 1.4440433 | 0.7067138 | 1.1952191 | 1.8382353 |
| Gyroidina umbonata          | 5.2380952 | 1.5037594 | 3.1007752 | 3.1818182 | 3.4351145 | 3.7174721 | 3.968254  | 3.7815126 | 1.5564202 | 0         | 1.0526316 | 0         | 0.3968254 | 0         | 0         | 0         | 0         | 0.7782101 | 0.3521127 | 0         | 1.0600707 | 0         | 1.4705882 |
| Porosonion granosum         | 0         | 0         | 0         | 0         | 0         | 0.3717472 | 0         | 0.4201681 | 0         | 2.3622047 | 1.754386  | 0         | 1.984127  | 2.0242915 | 0         | 0.7042254 | 3.5856574 | 2.7237354 | 3.1690141 | 2.5270758 | 2.1201413 | 0.3984064 | 6.25      |
| Textularia calva            | 4.2857143 | 1.8796992 | 0         | 1.8181818 | 0         | 0.7434944 | 0.7936508 | 1.2605042 | 1.5564202 | 1.5748031 | 0         | 1.0989011 | 0         | 1.2145749 | 1.8604651 | 1.4084507 | 0         | 0         | 3.8732394 | 0         | 2.8268551 | 0         | 2.5735294 |
| Elphidium sp                | 0         | 0         | 0         | 1.3636364 | 0         | 0.3717472 | 0         | 0.4201681 | 4.2801556 | 3.9370079 | 5.2631579 | 6.2271062 | 1.1904762 | 0.4048583 | 0.4651163 | 0.7042254 | 0         | 0.3891051 | 0.3521127 | 1.8050542 | 0         | 0         | 0         |
| Globobulimina affinis       | 2.8571429 | 3.0075188 | 3.4883721 | 5.9090909 | 5.3435115 | 1.8587361 | 0.3968254 | 0.8403361 | 0.3891051 | 0         | 0         | 0         | 0         | 0         | 0         | 0         | 0         | 0         | 0         | 0         | 0         | 0         | 0         |
| Rotalinoides gaimardii      | 0         | 0         | 0         | 0         | 0         | 0         | 0.3968254 | 0         | 0         | 0.3968254 | 0         | 0         | 0.7936508 | 1.2145749 | 0         | 2.4647887 | 0         | 0         | 1.7605634 | 4.33213   | 2.8268551 | 7.9681275 | 1.1029412 |
| Sigmolopsis schlumbergeri   | 0         | 2.2556391 | 2.3255814 | 0.4545455 | 0.3816794 | 0.3717472 | 0.3968254 | 2.5210084 | 1.5564202 | 0.7874016 | 0.3508772 | 0         | 0         | 0.4048583 | 0.4651163 | 2.1126761 | 1.1952191 | 0.3891051 | 0.7042254 | 0.3610108 | 0         | 0.3984064 | 0         |
| Bulimina costata            | 0.4761905 | 1.1278195 | 0.3875969 | 1.8181818 | 1.1450382 | 1.4869888 | 0         | 0.4201681 | 0.7782101 | 0.3937008 | 0         | 0         | 0.4048583 | 0.4651163 | 0.7042254 | 0.3984064 | 0.3891051 | 0         | 0         | 1.4134276 | 0.3984064 | 0.3676471 | 0         |
| Pyrgo inornata              | 0         | 0         | 0.3875969 | 0.4545455 | 0         | 0         | 1.1904762 | 0.4201681 | 1.5564202 | 0         | 0.3508772 | 1.0989011 | 0.7936508 | 0         | 1.8604651 | 0.3521127 | 0         | 0         | 0.7042254 | 1.0830325 | 0.7067138 | 0.7968127 | 0.3676471 |
| Lobatula lobatula           | 0         | 0         | 0.7751938 | 0.4545455 | 0.3816794 | 0.7434944 | 0         | 0.8403361 | 0.7782101 | 0         | 0         | 0.3663004 | 0.3968254 | 0.8097166 | 0.9302326 | 0.3521127 | 0         | 0.3891051 | 0.7042254 | 1.4440433 | 0.3533569 | 0.3984064 | 0.7352941 |
| Adelosina sp                | 0         | 0         | 0         | 0.4545455 | 0         | 1.1152416 | 0.7936508 | 0         | 0.3891051 | 0.3937008 | 1.0526316 | 0.7326007 | 0         | 0.8097166 | 0         | 0.7042254 | 0         | 1.1673152 | 0.3521127 | 0         | 0.7968127 | 0.7352941 | 0         |
| Elphidium cuvillieri        | 0         | 0         | 0         | 0         | 0         | 0         | 0         | 0         | 0         | 0         | 0         | 0         | 0         | 0         | 0         | 0         | 0         | 0         | 3.1690141 | 1.4440433 | 2.4734982 | 1.5936255 | 0         |
| Triloculina trigonula       | 0         | 0         | 0         | 0         | 0         | 0         | 0         | 0         | 0         | 0.3937008 | 2.8070175 | 0.3663004 | 0         | 0         | 1.3953488 | 0.3521127 | 0         | 0         | 0         | 0         | 0.7067138 | 0.7968127 | 0.7352941 |
| Sphaeroidina bulloides      | 0.952381  | 1.1278195 | 0.7751938 | 0         | 0.7633588 | 0.3717472 | 0         | 0         | 0         | 0.3937008 | 0         | 0         | 0         | 0         | 0         | 0         | 0         | 0         | 0         | 0         | 0.3533569 | 0.3984064 | 0.7352941 |
| Textularia pala             | 0         | 0         | 0         | 0         | 0         | 0         | 0         | 0         | 0         | 0         | 0         | 0         | 0         | 0         | 0         | 0         | 0         | 0         | 0         | 0.3610108 | 2.1201413 | 1.1952191 | 1.4705882 |
| Amphicoryna scalaris        | 0.4761905 | 0.3759398 | 0         | 0         | 0         | 0         | 0.3968254 | 0         | 1.1673152 | 0.3937008 | 0.3508772 | 0         | 0.3968254 | 0         | 0         | 0         | 0.3891051 | 0         | 0.3610108 | 0         | 0.7968127 | 0         | 0         |
| Lenticulina orbicularis     | 0.952381  | 0.3759398 | 0         | 0         | 0.7633588 | 0         | 0.3968254 | 0         | 0         | 0         | 0.7017544 | 0         | 0         | 0         | 0         | 0         | 0         | 0.3891051 | 0         | 0.7220217 | 0.3533569 | 0.3984064 | 0         |
| Elphidium macellum          | 0         | 0         | 0         | 0         | 0         | 0         | 0         | 0         | 0         | 0         | 0         | 0         | 0         | 0         | 0         | 0         | 0         | 0         | 0.7042254 | 0         | 0         | 0.4044176 | 0         |
| Elphidium punctatum         | 0         | 0         | 2.3255814 | 0.9090909 | 0         | 0         | 0         | 0         | 0         | 0         | 0         | 0         | 0         | 0         | 0         | 0         | 0         | 0         | 0.3521127 | 0         | 0         | 0         | 1.1029412 |
| Pyrgo sp                    | 0         | 0.3759398 | 0         | 0.4545455 | 0         | 0         | 0         | 0         | 0         | 0.3937008 | 0         | 0         | 0.3968254 | 0         | 0.4651163 | 0         | 0         | 0         | 0.7042254 | 0         | 1.0600707 | 0.3984064 | 0         |
| Lagena striata              | 0.4761905 | 0         | 0.7751938 | 0         | 1.1450382 | 0         | 0         | 0         | 0         | 0         | 1.0526316 | 0         | 0         | 0         | 0         | 0         | 0         | 0         | 0         | 0         | 0         | 0         | 0         |
| Miliolinella sp             | 0.952381  | 0         | 0         | 0         | 0         | 0.3717472 | 0         | 0         | 0.3891051 | 0         | 0.3508772 | 0         | 0         | 0         | 0.9302326 | 0.3521127 | 0         | 0         | 0         | 0         | 0         | 0         | 0         |
| Fissurina sp                | 0         | 0         | 0         | 0         | 0         | 0         | 0         | 0.4201681 | 1.1673152 | 0         | 0.7017544 | 0         | 0.3968254 | 0.4048583 | 0         | 0         | 0         | 0         | 0         | 0         | 0         | 0         | 0         |
| Cibicides pseudoungerianus  | 0         | 0         | 0         | 0         | 0.3717472 | 0.7936508 | 0.4201681 | 0         | 0         | 0         | 0         | 0         | 0         | 0         | 0         | 0         | 0         | 0         | 0         | 0.3533569 | 0         | 1.1029412 | 0         |
| Bulimina elongata           | 1.4285714 | 0         | 0         | 0         | 0         | 0         | 0         | 1.2605042 | 0         | 0         | 0         | 0         | 0         | 0         | 0         | 0         | 0         | 0         | 0         | 0         | 0         | 0         | 0         |
| Spiroloculina excavata      | 0         | 0         | 0         | 0         | 0.3717472 | 0         | 0         | 0.7782101 | 0         | 0.7017544 | 0         | 0.7936508 | 0         | 0         | 0         | 0         | 0         | 0         | 0         | 0         | 0         | 0         | 0         |
| Hanzawaia boueana           | 0.952381  | 0         | 0.7751938 | 0         | 0.3816794 | 0         | 0.3968254 | 0         | 0         | 0         | 0         | 0         | 0         | 0         | 0         | 0         | 0         | 0         | 0         | 0         | 0         | 0         | 0         |
| Globulina sp                | 0         | 0         | 0         | 0         | 0         | 0         | 0         | 0         | 0         | 0         | 0.7017544 | 0         | 0         | 0         | 0         | 0         | 1.5564202 | 0         | 0         | 0         | 0         | 0         | 0         |
| Neolenticulina variabilis   | 0         | 0.7518797 | 0         | 0         | 0         | 0         | 0         | 0.4201681 | 0         | 0         | 0.7017544 | 0         | 0         | 0         | 0         | 0         | 0         | 0         | 0         | 0         | 0.3533569 | 0         | 0         |
| Triloculina tricarinata     | 0         | 0         | 0         | 0         | 0         | 0         | 0         | 0         | 0         | 0         | 0         | 0         | 0         | 0.4048583 | 0         | 0.7042254 | 0         | 0         | 1.056338  | 0         | 0         | 0         | 0         |
| Textularia pseudorugosa     | 0         | 0         | 0         | 0         | 0.7434944 | 0         | 0         | 0         | 0         | 0         |           |           |           |           |           |           |           |           |           |           |           |           |           |
