# Supplementary material
Source: MDPI journal article supplement (https://www.mdpi.com/2073-4441/15/4/815)
Supplement: s1 [file s1]

| Species                              | Group      |
|--------------------------------------|------------|
| <i>Adelosina sp</i>                  | Oxic       |
| <i>Ammodiscus planorbis</i>          | Unassigned |
| <i>Ammonia beccarii</i>              | Suboxic    |
| <i>Amphicoryna scalaris</i>          | Oxic       |
| <i>Asterigerinata mamilla</i>        | Oxic       |
| <i>Bigenerina nodosaria</i>          | Oxic       |
| <i>Bolivina alata</i>                | Dysoxic    |
| <i>Bolivina catanensis</i>           | Dysoxic    |
| <i>Bolivina pseudoplicata</i>        | Dysoxic    |
| <i>Bolivina spathulata</i>           | Dysoxic    |
| <i>Bulimina costata</i>              | Dysoxic    |
| <i>Bulimina elongata</i>             | Dysoxic    |
| <i>Bulimina gibba</i>                | Dysoxic    |
| <i>Bulimina marginata</i>            | Dysoxic    |
| <i>Cassidulina carinata</i>          | Suboxic    |
| <i>Cibicidoides pseudoungerianus</i> | Oxic       |
| <i>Dentalina leguminiformis</i>      | Suboxic    |
| <i>Dentalina sp</i>                  | Unassigned |
| <i>Elphidium crispum</i>             | Oxic       |
| <i>Elphidium cuvillieri</i>          | Oxic       |
| <i>Elphidium incertum</i>            | Oxic       |
| <i>Elphidium macellum</i>            | Oxic       |
| <i>Elphidium punctatum</i>           | Oxic       |
| <i>Elphidium sp</i>                  | Oxic       |
| <i>Fissurina marginata</i>           | Suboxic    |
| <i>Fissurina neptuni</i>             | Suboxic    |
| <i>Fissurina orbignyana</i>          | Suboxic    |
| <i>Fissurina sp</i>                  | Unassigned |
| <i>Globobulimina affinis</i>         | Dysoxic    |
| <i>Globocassidulina crassa</i>       | Oxic       |
| <i>Globocassidulina subglobosa</i>   | Oxic       |
| <i>Globulina sp</i>                  | Dysoxic    |
| <i>Gyroidina altiformis</i>          | Suboxic    |
| <i>Gyroidina umbonata</i>            | Suboxic    |
| <i>Hanzawaia boueana</i>             | Oxic       |
| <i>Hyalinea balthica</i>             | Oxic       |
| <i>Lagena striata</i>                | Suboxic    |
| <i>Lagenammia atlantica</i>          | Unassigned |
| <i>Lenticulina orbicularis</i>       | Suboxic    |
| <i>Lenticulina sp</i>                | Suboxic    |
| <i>Lobatula lobatula</i>             | Oxic       |
| <i>Marginulina sp</i>                | Unassigned |
| <i>Melonis barleea</i>               | Suboxic    |
| <i>Melonis pompilioides</i>          | Dysoxic    |
| <i>Miliolinella sp</i>               | Oxic       |
| <i>Neolenticulina variabilis</i>     | Suboxic    |

|                                   |            |
|-----------------------------------|------------|
| <i>Peneroplis sp</i>              | Oxic       |
| <i>Porosononion granosum</i>      | Oxic       |
| <i>Pseudoclavulina crustata</i>   | Unassigned |
| <i>Pyrgo elongata</i>             | Oxic       |
| <i>Pyrgo inornata</i>             | Oxic       |
| <i>Pyrgo sp</i>                   | Oxic       |
| <i>Quinqueloculina boschiana</i>  | Oxic       |
| <i>Quinqueloculina jugosa</i>     | Oxic       |
| <i>Quinqueloculina padana</i>     | Oxic       |
| <i>Rectuvigerina phlegeri</i>     | Suboxic    |
| <i>Rosalina sp</i>                | Oxic       |
| <i>Rotalinoides gaimardii</i>     | Unassigned |
| <i>Sigmoilopsis schlumbergeri</i> | Suboxic    |
| <i>Sphaeroidina bulloides</i>     | Unassigned |
| <i>Spiroloculina excavata</i>     | Oxic       |
| <i>Spiroplectinella wrighti</i>   | Oxic       |
| <i>Textularia calva</i>           | Oxic       |
| <i>Textularia conica</i>          | Oxic       |
| <i>Textularia pala</i>            | Oxic       |
| <i>Textularia pseudorugosa</i>    | Oxic       |
| <i>Triloculina tricarinata</i>    | Oxic       |
| <i>Triloculina trigonula</i>      | Oxic       |
| <i>Uvigerina mediterranea</i>     | Suboxic    |
| <i>Uvigerina peregrina</i>        | Suboxic    |
| <i>Valvulineria bradyana</i>      | Dysoxic    |
